# Supplementary material
Source: Springer Nature journal article supplement (https://hal.science/hal-01341221v1/file/12711_2012_2602_MOESM1_ESM.pdf)
Supplement: MOESM1 [file 12711_2012_2602_MOESM1_ESM.pdf]

**MARTINIQUE  
BLACK  
BELLY**

**ROMANE**

**4 x F1  
SIRE**

**BACK  
CROSS**
